# Supplementary material for: Magnetically-actuated artificial cilia for microfluidic propulsion
Source: Royal Society of Chemistry journal article supplement (doi:10.1039/c0lc00411a), 2011-01-01
Supplement: c0lc00411a.pdf [file c0lc00411a.pdf]

## **Explanation of the animations accompanying the manuscript entitled “Magnetically-actuated artificial cilia for microfluidic propulsion”**

In the movies the motion of fluid particles due to the motion of the cilia is shown for uniformly-beating cilia, symplectic and antiplectic metachrony (for a cilia spacing equal to 1.67 times their length). The white circles represent the fluid particles. The contours are the absolute velocity normalised with  $L/t_{beat}$  ranging from 0 (blue) to 2 (red). The direction of the velocity is shown using the arrows on the streamlines. The white arrows show the magnetic field experienced by the cilia.

1. closed\_loop\_loc.wmv -- Motion of fluid particles for synchronous motion of cilia operating in a closed-loop channel.
2. n\_6\_wk\_1\_loc\_supporting\_info.wmv -- Motion of fluid particles for antiplectic metachronal motion of cilia.
3. n\_6\_wk\_m1\_loc\_supporting\_info.wmv -- Motion of fluid particles for symplectic metachronal motion of cilia.
